# Covid-19 is a leading cause of death in children and young people ages 0-19 years in the United States

Seth Flaxman PhD<sup>1</sup>,+ Charles Whittaker MSc<sup>2</sup>, Elizaveta Semenova PhD<sup>1</sup>, Theo Rashid<sup>3</sup>, Robbie M Parks PhD<sup>4</sup>, Alexandra Blenkinsop<sup>5</sup>, H Juliette T Unwin<sup>2</sup>, Swapnil Mishra<sup>6</sup>, Samir Bhatt<sup>2,6</sup>, Deepti Gurdasani<sup>7</sup>, Oliver Ratmann<sup>5</sup>

1. Department of Computer Science, University of Oxford, Oxford, UK
2. MRC Centre for Global Infectious Disease Analysis, Jameel Institute for Disease and Emergency Analytics, Imperial College London, UK
3. Department of Epidemiology and Biostatistics, School of Public Health, Imperial College London, UK
4. Department of Environmental Health Sciences, Mailman School of Public Health, Columbia University, New York, New York, USA
5. Department of Mathematics, Imperial College London, UK
6. Department of Public Health, University of Copenhagen, Copenhagen, Denmark,
7. Queen Mary University of London

+ Correspondence to: [seth.flaxman@cs.ox.ac.uk](mailto:seth.flaxman@cs.ox.ac.uk)  
Department of Computer Science, Wolfson Building, Parks Road, Oxford OX1 3QD, UK

## Abstract

Covid-19 has caused more than 1 million deaths in the US, including at least 1,088 deaths among children and young people (CYP) aged 0-19 years, with 764 occurring in the one year period April 1, 2021 - March 31, 2022. Deaths among US CYP are rare in general, and so we argue here that the mortality burden of Covid-19 in CYP is best understood in the context of all other causes of CYP death. Using publicly available data from CDC WONDER, and comparing to mortality in 2019, the immediate pre-pandemic period, we find that Covid-19 mortality is a leading cause of death in CYP aged 0-19 years in the US, ranking #8 among all causes of deaths, #5 in disease related causes of deaths (excluding accidents, assault and suicide), and #1 in deaths caused by infectious or respiratory diseases. Due to the impact of mitigations such as social distancing and our comparison of a single disease (Covid-19) to groups of causes such as deaths from pneumonia and influenza, these rankings are likely conservative lower bounds. Our findings underscore the public health relevance of Covid-19 to CYP. In the likely future context of sustained SARS-CoV-2 circulation, pharmaceutical and non-pharmaceutical interventions continue to play an important role in limiting transmission of the virus in CYP and mitigating severe disease.

## Introduction

In the one year period April 1, 2021 - March 31, 2022 there were more than 381,000 deaths from Covid-19 in the US<sup>1</sup> (a rate of 115 / 100,000 population). In children and young people (CYP) aged 0-19 years there were 764 deaths reported in this time period (0.9 / 100,000 population). The overall risk of death from Covid-19 in CYP is thus significantly reduced compared to other age groups in the US. Given deaths in US CYP from all causes are rare (49.4 per 100,000 in 2019 for 0-19 year olds; 25.0 per 100,000 for 1-19 year olds), the mortality burden of Covid-19 is best understood by comparing it to other significant causes of CYP mortality from a recent pre-Covid-19 period. For this purpose, we use the US Centers for Disease Control and Prevention (CDC) WONDER database of mortality statistics, grouped according to underlying cause of death. The groups of causes are defined by the US National Center for Health Statistics (NCHS)'s list of 113 "rankable causes of death", originally drawn up in 1951 to allow comparisons for public health purposes, and regularly updated<sup>2</sup>. Covid-19 (ICD code U07.1) was added to this list in October 2020<sup>3</sup>. We consider the leading causes of death in 2019, that is, the ordered list of groups of causes that occur most frequently among NCHS's rankable causes of death<sup>2</sup>. Leading causes of death are one among various ways of understanding mortality and burden of disease.

## Methods

We obtained leading causes of death by age group in 2019 from CDC WONDER<sup>4</sup>, which has been comprehensively described elsewhere<sup>2</sup>, and compared these to Covid-19 mortality in our study period, April 1, 2021-March 31, 2022, obtained from CDC WONDER Provisional Mortality Statistics<sup>1</sup> (the most recent 1 year period in which data is close to complete<sup>5</sup>.) To determine pediatric death rates by cause of death, we used 2021 population size estimates by single year of age from the US Census Bureau<sup>6</sup>. We note that NCHS's list of rankable causes of death group together many individual ICD codes<sup>2</sup>, while Covid-19 deaths count only those for which a single ICD code (U07.1) was listed as the underlying cause of death; we are therefore comparing the direct effect of a *single* pathogen (SARS-CoV-2) to groupings of multiple underlying causes of death. We also note that the CDC WONDER Provisional Mortality Statistics could still be revised in the future. They also do not include deaths where Covid-19 was considered to have been a contributing cause of death,<sup>1</sup> and thus differ from other datasets reporting Covid-19 deaths, e.g. NCHS has a separate source reporting counts of deaths involving Covid-19<sup>7</sup> (a previous version of this preprint incorrectly used these data<sup>8</sup>.)

## Results

Like many diseases, pediatric Covid-19 death rates follow a characteristic U-shaped curve in the US (Figure 1). In the study period, Covid-19 death rates in infants aged <1 year were 3.5 deaths per 100,000 population. The Covid-19 death rate was below 1 per 100,000 in children aged 1-14, increasing to 1.8 per 100,000 in 15-19-year olds. Considering the marked, age-specific U-shape in pediatric Covid-19 death rates, we next compared the burden of Covid-19 to other causes of death in five age brackets: <1 year, 1-4 years, 5-9, 10-14, and 15-19 years.

In 2019, leading causes of CYP deaths comprised perinatal conditions (12.7 / 100,000), accidents (9.1 / 100,000), congenital malformations or deformations (6.5 / 100,000), assault (3.4 / 100,000), suicide (3.4 / 100,000), malignant neoplasms (2.1 / 100,000), diseases of the heart (1.1 / 100,000), and influenza and pneumonia (0.6 / 100,000).

For comparison, in the study period, there were 764 CYP deaths reported whose underlying cause was Covid-19 (0.9 / 100,000), meaning it ranks as the #8 cause of death (Table 2) and accounts for 2.3% of the top 10 causes. Rankings disaggregated by age group are shown in Table 1, demonstrating that Covid-19 ranks consistently in the top 10 causes of death in CYP in all age groups. Ranks are: #7 (<1 year old), #7 (1-4 year olds), #6 (5-9 year olds), #6 (10-14 year olds), and #5 (15-19 year olds). Covid-19 accounted for 0.7% (<1 year old), 2.7% (1-4 year olds), 4.4% (5-9 year olds), 3.9% (10-14 year olds), and 4.2% (15-19 year olds) of the top 10 leading causes of death by age group.

Excluding causes of death unrelated to disease (accidents, assault and suicide), Covid-19 ranked as the #5 cause of death in US CYP aged 0-19 (Table 2). Considering infectious and respiratory diseases only, Covid-19 ranked as the #1 cause of death in US CYP aged 0-19 (Table 3).

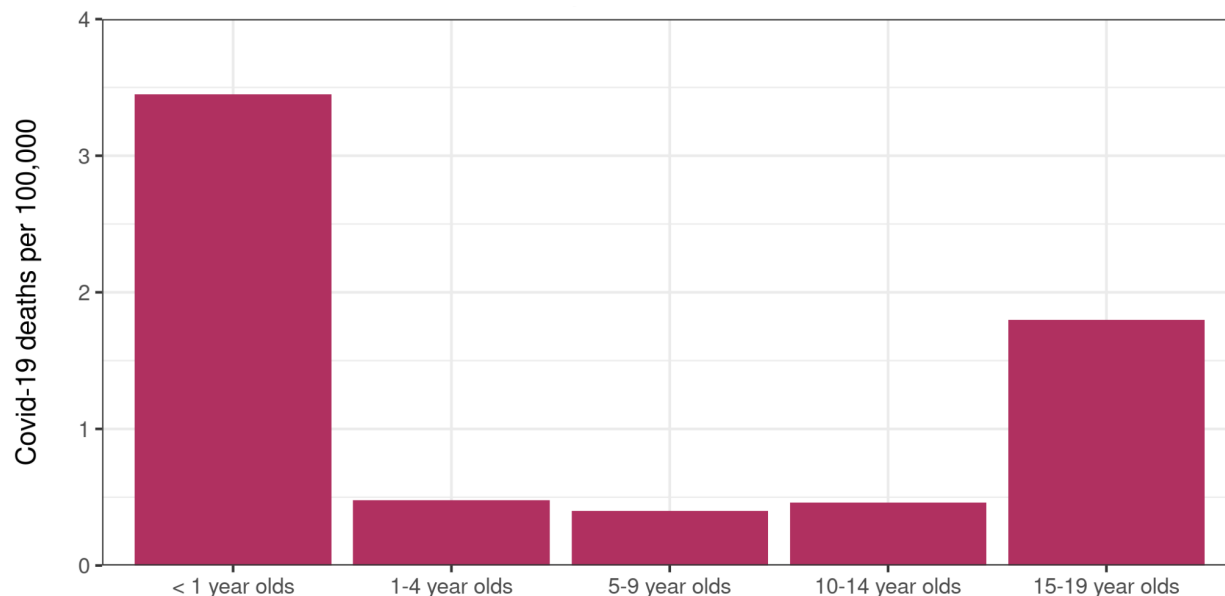

**Figure 1.** Covid-19 death rates in the US for children and young people, where Covid-19 is listed as the underlying cause of death (ICD code U07.1) on the death certificate<sup>1</sup>. Rates are calculated as Covid-19 deaths for the period April 1, 2021-March 31, 2022 per 100,000 population (2021 population estimates).

## Conclusion

Early in the Covid-19 pandemic, comparisons of Covid-19 disease severity between age groups were a vital tool for appropriately allocating limited resources and prioritizing vaccination campaigns. However, long-term public health planning and management needs to be informed by the leading causes of deaths within each age group, a practice in the US dating back at least 7 decades, beginning with the first publication of a leading cause of death ranking in 1952<sup>2</sup>. The most recent comprehensive data pre-pandemic on leading causes of death covers 2019<sup>2</sup>. Comparing to this period, we have shown that Covid-19 was a leading cause of death in CYP aged 0-19 years in the US for the period April 1, 2021-March 31, 2022, ranking #8 among all causes of deaths (comprising 2.3% of the top 10 causes), #5 in disease related causes of deaths (excluding accidents, assault and suicide), and #1 in deaths caused by infectious and respiratory diseases.

These findings need to be considered in the context of several limitations. While analyses of excess deaths have suggested under-reporting bias in Covid-19 deaths<sup>9</sup>, it is important to note that the specific criteria for determining Covid-19 deaths is heterogeneous across the US and may be subject to both under and over reporting depending on the context, in addition to delays in reporting. Some of the cause of death categories vary in specificity, for example, the category of deaths from “influenza and

pneumonia” combines a variety of causes, to which SARS-CoV-2 could be a contributing factor<sup>10,11</sup>. Relatedly, we only consider Covid-19 as an underlying (and not contributing) cause of death, but Covid-19 amplifies the severe impacts of other diseases and mortality hazards from infection are increased with accompanying comorbidities. It is thus likely that the absolute mortality burden of Covid-19 has been larger in CYP aged 0-19 than our analyses suggest, but the exact magnitude is unknown.

In summary, we find that Covid-19 is now a leading cause of death for CYP aged 0-19 in the US. A future variant or subvariant capable of displacing current Omicron subvariants will, by definition, have a growth advantage over Omicron, and there is no guarantee that its intrinsic severity will be reduced<sup>12</sup>. In the context of sustained transmission and circulation of SARS-CoV-2 in the US, the non-trivial risk posed by Covid-19 to CYP warrants utilization of a wide and robust array of tools to limit the extent of infection and severe disease in this age-group, through a combination of safe and efficacious vaccination against the disease<sup>13</sup>, appropriate pharmaceutical treatments, mitigations such as ventilation, and other non-pharmaceutical interventions.

## Tables

| <b>Table 1(a)</b>                                                               |                                 |               |             |                    |
|---------------------------------------------------------------------------------|---------------------------------|---------------|-------------|--------------------|
| <b>Age: &lt; 1 year</b>                                                         |                                 |               |             |                    |
| <b>Leading Causes of Death</b>                                                  | <b>Crude Rate (per 100,000)</b> | <b>Deaths</b> | <b>Rank</b> | <b>% of top 10</b> |
| #Certain conditions originating in the perinatal period (P00-P96)               | 272.1                           | 10294         | 1           | 60.7               |
| #Congenital malformations, deformations and chromosomal abnormalities (Q00-Q99) | 113.7                           | 4301          | 2           | 25.3               |
| #Accidents (unintentional injuries) (V01-X59,Y85-Y86)                           | 33.5                            | 1266          | 3           | 7.5                |
| #Diseases of heart (I00-I09,I11,I13,I20-I51)                                    | 7.1                             | 268           | 4           | 1.6                |
| #Assault (homicide) (*U01-*U02,X85-Y09,Y87.1)                                   | 7                               | 263           | 5           | 1.6                |
| #Influenza and pneumonia (J09-J18)                                              | 4.1                             | 156           | 6           | 0.9                |
| #Septicemia (A40-A41)                                                           | 3.5                             | 133           | 7           | 0.8                |

|                                                                        |     |     |    |     |
|------------------------------------------------------------------------|-----|-----|----|-----|
| #COVID-19 (U07.1)                                                      | 3.5 | 123 | 7  | 0.7 |
| #Cerebrovascular diseases (I60-I69)                                    | 2.7 | 102 | 9  | 0.6 |
| #Nephritis, nephrotic syndrome and nephrosis (N00-N07,N17-N19,N25-N27) | 1.6 | 61  | 10 | 0.4 |

| <b>Table 1(b)</b>                                                                             |                                 |               |             |                    |
|-----------------------------------------------------------------------------------------------|---------------------------------|---------------|-------------|--------------------|
| <b>Age: 1-4 year olds</b>                                                                     |                                 |               |             |                    |
| <b>Leading Causes of Death</b>                                                                | <b>Crude Rate (per 100,000)</b> | <b>Deaths</b> | <b>Rank</b> | <b>% of top 10</b> |
| #Accidents (unintentional injuries) (V01-X59,Y85-Y86)                                         | 7.3                             | 1149          | 1           | 43                 |
| #Congenital malformations, deformations and chromosomal abnormalities (Q00-Q99)               | 2.6                             | 416           | 2           | 15.6               |
| #Malignant neoplasms (C00-C97)                                                                | 1.8                             | 285           | 3           | 10.7               |
| #Assault (homicide) (*U01-*U02,X85-Y09,Y87.1)                                                 | 1.8                             | 284           | 3           | 10.6               |
| #Diseases of heart (I00-I09,I11,I13,I20-I51)                                                  | 0.8                             | 133           | 5           | 5                  |
| #Influenza and pneumonia (J09-J18)                                                            | 0.8                             | 122           | 5           | 4.6                |
| #COVID-19 (U07.1)                                                                             | 0.5                             | 73            | 7           | 2.7                |
| #Certain conditions originating in the perinatal period (P00-P96)                             | 0.4                             | 57            | 8           | 2.1                |
| #Septicemia (A40-A41)                                                                         | 0.3                             | 53            | 9           | 2                  |
| #Cerebrovascular diseases (I60-I69)                                                           | 0.3                             | 52            | 9           | 1.9                |
| #In situ neoplasms, benign neoplasms and neoplasms of uncertain or unknown behavior (D00-D48) | 0.3                             | 49            | 9           | 1.8                |

| <b>Table 1(c)</b>                                     |                                 |               |             |                    |
|-------------------------------------------------------|---------------------------------|---------------|-------------|--------------------|
| <b>Age: 5-9 year olds</b>                             |                                 |               |             |                    |
| <b>Leading Causes of Death</b>                        | <b>Crude Rate (per 100,000)</b> | <b>Deaths</b> | <b>Rank</b> | <b>% of top 10</b> |
| #Accidents (unintentional injuries) (V01-X59,Y85-Y86) | 3.5                             | 714           | 1           | 39                 |
| #Malignant neoplasms (C00-C97)                        | 1.8                             | 371           | 2           | 20.3               |
| #Congenital malformations, deformations and           | 1                               | 192           | 3           | 10.5               |

|                                                                                               |     |     |   |     |
|-----------------------------------------------------------------------------------------------|-----|-----|---|-----|
| chromosomal abnormalities (Q00-Q99)                                                           |     |     |   |     |
| #Assault (homicide) (*U01-*U02,X85-Y09,Y87.1)                                                 | 0.8 | 155 | 4 | 8.5 |
| #Diseases of heart (I00-I09,I11,I13,I20-I51)                                                  | 0.5 | 91  | 5 | 5   |
| #COVID-19 (U07.1)                                                                             | 0.4 | 81  | 6 | 4.4 |
| #Chronic lower respiratory diseases (J40-J47)                                                 | 0.3 | 69  | 7 | 3.8 |
| #Influenza and pneumonia (J09-J18)                                                            | 0.3 | 52  | 7 | 2.8 |
| #Cerebrovascular diseases (I60-I69)                                                           | 0.2 | 37  | 9 | 2   |
| #Septicemia (A40-A41)                                                                         | 0.2 | 36  | 9 | 2   |
| #In situ neoplasms, benign neoplasms and neoplasms of uncertain or unknown behavior (D00-D48) | 0.2 | 31  | 9 | 1.7 |

**Table 1(d)**  
**Age: 10-14 year olds**

| <b>Leading Causes of Death</b>                                                                | <b>Crude Rate (per 100,000)</b> | <b>Deaths</b> | <b>Rank</b> | <b>% of top 10</b> |
|-----------------------------------------------------------------------------------------------|---------------------------------|---------------|-------------|--------------------|
| #Accidents (unintentional injuries) (V01-X59,Y85-Y86)                                         | 3.7                             | 778           | 1           | 30.9               |
| #Intentional self-harm (suicide) (*U03,X60-X84,Y87.0)                                         | 2.6                             | 534           | 2           | 21.2               |
| #Malignant neoplasms (C00-C97)                                                                | 1.9                             | 404           | 3           | 16.1               |
| #Assault (homicide) (*U01-*U02,X85-Y09,Y87.1)                                                 | 0.9                             | 191           | 4           | 7.6                |
| #Congenital malformations, deformations and chromosomal abnormalities (Q00-Q99)               | 0.9                             | 189           | 4           | 7.5                |
| #COVID-19 (U07.1)                                                                             | 0.5                             | 99            | 6           | 3.9                |
| #Diseases of heart (I00-I09,I11,I13,I20-I51)                                                  | 0.4                             | 87            | 7           | 3.5                |
| #Chronic lower respiratory diseases (J40-J47)                                                 | 0.4                             | 81            | 7           | 3.2                |
| #Influenza and pneumonia (J09-J18)                                                            | 0.3                             | 71            | 9           | 2.8                |
| #Cerebrovascular diseases (I60-I69)                                                           | 0.2                             | 48            | 10          | 1.9                |
| #In situ neoplasms, benign neoplasms and neoplasms of uncertain or unknown behavior (D00-D48) | 0.2                             | 35            | 10          | 1.4                |

| <b>Table 1(e)</b>                                                               |                                 |               |             |                    |
|---------------------------------------------------------------------------------|---------------------------------|---------------|-------------|--------------------|
| <b>Age: 15-19 year olds</b>                                                     |                                 |               |             |                    |
| <b>Leading Causes of Death</b>                                                  | <b>Crude Rate (per 100,000)</b> | <b>Deaths</b> | <b>Rank</b> | <b>% of top 10</b> |
| #Accidents (unintentional injuries) (V01-X59,Y85-Y86)                           | 16.8                            | 3537          | 1           | 37.9               |
| #Intentional self-harm (suicide) (*U03,X60-X84,Y87.0)                           | 10.5                            | 2210          | 2           | 23.7               |
| #Assault (homicide) (*U01-*U02,X85-Y09,Y87.1)                                   | 8.9                             | 1877          | 3           | 20.1               |
| #Malignant neoplasms (C00-C97)                                                  | 2.8                             | 589           | 4           | 6.3                |
| #COVID-19 (U07.1)                                                               | 1.8                             | 388           | 5           | 4.2                |
| #Diseases of heart (I00-I09,I11,I13,I20-I51)                                    | 1.4                             | 288           | 6           | 3.1                |
| #Congenital malformations, deformations and chromosomal abnormalities (Q00-Q99) | 0.9                             | 188           | 7           | 2                  |
| #Influenza and pneumonia (J09-J18)                                              | 0.3                             | 71            | 8           | 0.8                |
| #Chronic lower respiratory diseases (J40-J47)                                   | 0.3                             | 60            | 8           | 0.6                |
| #Diabetes mellitus (E10-E14)                                                    | 0.3                             | 59            | 8           | 0.6                |
| #Cerebrovascular diseases (I60-I69)                                             | 0.3                             | 58            | 8           | 0.6                |

**Table 1.** Leading causes of death for children and young people aged 0-19 years in 2019 in the US ranked, compared to Covid-19 deaths (April 1, 2021-March 31, 2022). Deaths, crude rates per 100,000, ranks, and percentage of the top 10 causes are shown for ages < 1 year (a), 1-4 years (b), 5-9 years (c), 10-14 years (d), 15-19 years (e). In all cases, Covid-19 is a leading cause of death: it ranks among the top 10 “rankable” causes of death (a subset of the 113 selected causes of death to which Covid-19 was added in 2020<sup>3</sup>).



| <b>Table 2</b>                                                                  |                                 |               |             |                    |
|---------------------------------------------------------------------------------|---------------------------------|---------------|-------------|--------------------|
| <b>Ages: 0-19 year olds</b>                                                     |                                 |               |             |                    |
| <b>Leading Causes of Death</b>                                                  | <b>Crude Rate (per 100,000)</b> | <b>Deaths</b> | <b>Rank</b> | <b>% of top 10</b> |
| #Certain conditions originating in the perinatal period (P00-P96)               | 12.7                            | 10387         | 1           | 31.4               |
| #Accidents (unintentional injuries) (V01-X59,Y85-Y86)                           | 9.1                             | 7444          | 2           | 22.5               |
| #Congenital malformations, deformations and chromosomal abnormalities (Q00-Q99) | 6.5                             | 5286          | 3           | 16                 |
| #Assault (homicide) (*U01-*U02,X85-Y09,Y87.1)                                   | 3.4                             | 2770          | 4           | 8.4                |
| #Intentional self-harm (suicide) (*U03,X60-X84,Y87.0)                           | 3.4                             | 2756          | 4           | 8.3                |
| #Malignant neoplasms (C00-C97)                                                  | 2.1                             | 1704          | 6           | 5.2                |
| #Diseases of heart (I00-I09,I11,I13,I20-I51)                                    | 1.1                             | 867           | 7           | 2.6                |
| #COVID-19 (U07.1)                                                               | 0.9                             | 764           | 8           | 2.3                |
| #Influenza and pneumonia (J09-J18)                                              | 0.6                             | 472           | 9           | 1.4                |
| #Cerebrovascular diseases (I60-I69)                                             | 0.4                             | 297           | 10          | 0.9                |
| #Septicemia (A40-A41)                                                           | 0.4                             | 287           | 10          | 0.9                |

**Table 2.** Leading causes of death for children and young people aged 0-19 years in 2019 in the US ranked, compared to Covid-19 deaths (April 1, 2021-March 31, 2022). Deaths, crude rates per 100,000, ranks, and percentage of the top 10 causes are shown. In all cases, Covid-19 is a leading cause of death: it ranks among the top 10 “rankable” causes of death (a subset of the 113 selected causes of death to which Covid-19 was added in 2020<sup>3</sup>).

| <b>Table 3</b><br><b>Ages: 0-19 year olds</b>                                                                                                                                           |                                     |               |             |
|-----------------------------------------------------------------------------------------------------------------------------------------------------------------------------------------|-------------------------------------|---------------|-------------|
| <b>Leading Cause of Death from:<br/>A00-B99 (Certain infectious and parasitic diseases) and<br/>J00-J98 (Diseases of the respiratory system)</b>                                        | <b>Crude Rate<br/>(per 100,000)</b> | <b>Deaths</b> | <b>Rank</b> |
| #COVID-19 (U07.1)                                                                                                                                                                       | 0.9                                 | 764           | 1           |
| #Influenza and pneumonia (J09-J18)                                                                                                                                                      | 0.6                                 | 472           | 2           |
| Other and unspecified infectious and parasitic diseases and their sequelae<br>(A00,A05,A20-A36,A42-A44,A48-A49,A54-A79,A81-A82,A85.0-A85.1,A85.8,A86-B04,B06-B09,B25-B49,B55-B99,U07.1) | 0.5                                 | 432           | 3           |
| Other diseases of respiratory system (J00-J06,J30-J39,J67,J70-J98)                                                                                                                      | 0.5                                 | 421           | 3           |
| Pneumonia (J12-J18)                                                                                                                                                                     | 0.4                                 | 300           | 5           |
| #Septicemia (A40-A41)                                                                                                                                                                   | 0.4                                 | 287           | 5           |
| #Chronic lower respiratory diseases (J40-J47)                                                                                                                                           | 0.3                                 | 259           | 7           |
| Certain other intestinal infections (A04,A07-A09)                                                                                                                                       | 0.3                                 | 223           | 7           |
| Asthma (J45-J46)                                                                                                                                                                        | 0.3                                 | 206           | 7           |
| Influenza (J09-J11)                                                                                                                                                                     | 0.2                                 | 172           | 10          |

**Table 3.** Causes of death from the A00-B99 (Certain infectious and parasitic diseases) and J00-J98 (Diseases of the respiratory system) causes on the ICD-10 113 Cause List. Data is for children and young people aged 0-19 years in 2019 in the US ranked by number of deaths, compared to Covid-19 deaths (April 1, 2021-March 31, 2022). Deaths, crude rates per 100,000, and ranks are shown. Covid-19 is the #1 cause of death among infectious disease / diseases of the respiratory system. Note that categories are overlapping, as indicated by the codes, e.g. pneumonia (J12-J18) is a subset of Influenza and pneumonia (J09-J18). A "#" symbol precedes "rankable" causes of death, a subset of the 113 causes of death to which Covid-19 was added in 2020<sup>3</sup>.

## Ethics

According to HRA decision tools (<http://www.hra-decisiontools.org.uk/research/>), our study is considered Research, and according to the NHS REC review tool (<http://www.hra-decisiontools.org.uk/ethics/>), we do not need NHS Research Ethics Committee (REC) review, as we only used (1) publicly available, (2) anonymized, and (3) aggregated data outside of clinical settings.

## Funding

ES and SF acknowledge funding from the EPSRC (EP/V002910/2), OR from the MRC (MR/V038109/1). SM and SB acknowledge funding from the Novo Nordisk Young Investigator Award (NNF20OC0059309). CW acknowledges funding from the MRC DTP that supports his PhD studies (Award Ref 1975152). This research was funded in whole or in part by EPSRC (EP/V002910/2). For the purpose of Open Access, the author has applied a CC BY public copyright license to any Author Accepted Manuscript (AAM) version arising from this submission.

## Code Availability

All data and R scripts for replicating the results in this manuscript are available from: <https://github.com/flaxter/covid19pediatric/>

## References

1. Provisional Mortality Statistics, 2018 through Last Month Request [Internet]. [cited 2022 Jun 23]; Available from: <https://wonder.cdc.gov/mcd-icd10-provisional.html>
2. Heron M. Deaths: Leading Causes for 2019. *Natl Vital Stat Rep* 2021;70(9):1–114.
3. National Center for Health Statistics. ICD-10 Underlying Cause-of-Death Lists for Tabulating Mortality Statistics, 2020. Updated October 2020. 2020.
4. Underlying cause of death, 1999-2020 request [Internet]. [cited 2022 May 13]; Available from: <http://wonder.cdc.gov/ucd-icd10.html>
5. Provisional Mortality by Multiple Cause of Death [Internet]. [cited 2022 Jun 27]; Available from: <https://wonder.cdc.gov/wonder/help/mcd-provisional.html>
6. US Census Bureau. National Population by Characteristics: 2020-2021. 2022 [cited 2022 Jun 27]; Available from: <https://www.census.gov/data/tables/time-series/demo/popest/2020s-national-detail.html>
7. Weekly updates by select demographic and geographic characteristics [Internet]. 2022 [cited 2022 Jun 27]; Available from: [https://www.cdc.gov/nchs/nvss/vsrr/covid\\_weekly/index.htm](https://www.cdc.gov/nchs/nvss/vsrr/covid_weekly/index.htm)

8. Flaxman S, Whittaker C, Semenova E, et al. Covid-19 is a leading cause of death in children and young people ages 0-19 years in the United States [Internet]. Version 2. medRxiv. 2022; Available from: <https://www.medrxiv.org/content/10.1101/2022.05.23.22275458v2>
9. Whittaker C, Walker PGT, Alhaffar M, et al. Under-reporting of deaths limits our understanding of true burden of covid-19. *BMJ* 2021;375:n2239.
10. Swets MC, Russell CD, Harrison EM, et al. SARS-CoV-2 co-infection with influenza viruses, respiratory syncytial virus, or adenoviruses. *Lancet* 2022;399(10334):1463–4.
11. Parisi GF, Indolfi C, Decimo F, Leonardi S, Miraglia Del Giudice M. COVID-19 Pneumonia in Children: From Etiology to Management. *Front Pediatr* 2020;8:616622.
12. Markov PV, Katzourakis A, Stilianakis NI. Antigenic evolution will lead to new SARS-CoV-2 variants with unpredictable severity. *Nat Rev Microbiol* 2022;20(5):251–2.
13. Price AM, Olson SM, Newhams MM, et al. BNT162b2 Protection against the Omicron Variant in Children and Adolescents. *N Engl J Med* 2022;386(20):1899–909.
