# Supplementary material for: Covid-19 is a leading cause of death in children and young people ages 0-19 years in the United States
Source: bioRxiv or medRxiv preprint supplement (doi:10.1101/2022.05.23.22275458), 2022-09-20
Supplement: Supplementary file [file media-1.pdf]

# Supplementary tables for “Covid-19 is a leading cause of death in children and young people ages 0-19 years in the United States”

| Ages: < 28 days                                                                            |        |            |      |
|--------------------------------------------------------------------------------------------|--------|------------|------|
| 10 Leading Causes of Death (Infants)                                                       | Deaths | Crude Rate | Rank |
| #Disorders related to short gestation and low birth weight, not elsewhere classified (P07) | 3374   | 0.9        | 1    |
| #Congenital malformations, deformations and chromosomal abnormalities (Q00-Q99)            | 3047   | 0.8        | 2    |
| #Newborn affected by maternal complications of pregnancy (P01)                             | 1240   | 0.3        | 3    |
| #Newborn affected by complications of placenta, cord and membranes (P02)                   | 731    | 0.2        | 4    |
| #Bacterial sepsis of newborn (P36)                                                         | 579    | 0.2        | 4    |
| #Respiratory distress of newborn (P22)                                                     | 409    | 0.1        | 6    |
| #Neonatal hemorrhage (P50-P52,P54)                                                         | 335    | 0.1        | 6    |
| #Intrauterine hypoxia and birth asphyxia (P20-P21)                                         | 320    | 0.1        | 6    |
| #Necrotizing enterocolitis of newborn (P77)                                                | 312    | 0.1        | 6    |
| #Atelectasis (P28.0-P28.1)                                                                 | 230    | 0.1        | 6    |

**Supplementary Table 1.** Leading causes of death from the rankable causes on the NCHS 130 Selected Causes of Infant Death List, for neonates (< 28 days old) in 2019 in the US ranked. There were 36 Covid-19 deaths (April 1, 2021-March 31, 2022) for this age group. Deaths, crude rates per 100,000 live births, and ranks are shown.

| <b>Ages: 28-364 days</b>                                                                   |               |                   |             |
|--------------------------------------------------------------------------------------------|---------------|-------------------|-------------|
| <b>10 Leading Causes of Death (Infants)</b>                                                | <b>Deaths</b> | <b>Crude Rate</b> | <b>Rank</b> |
| #Congenital malformations, deformations and chromosomal abnormalities (Q00-Q99)            | 1254          | 0.3               | 1           |
| #Accidents (unintentional injuries) (V01-X59)                                              | 1125          | 0.3               | 1           |
| #Sudden infant death syndrome (R95)                                                        | 1110          | 0.3               | 1           |
| #Diseases of the circulatory system (I00-I99)                                              | 326           | 0.1               | 4           |
| #Assault (homicide) (*U01,X85-Y09)                                                         | 247           | 0.1               | 4           |
| #Diarrhea and gastroenteritis of infectious origin (A09)                                   | 180           | 0                 | 5           |
| #Influenza and pneumonia (J09-J18)                                                         | 156           | 0                 | 5           |
| #Chronic respiratory disease originating in the perinatal period (P27)                     | 148           | 0                 | 5           |
| #Septicemia (A40-A41)                                                                      | 131           | 0                 | 5           |
| #Disorders related to short gestation and low birth weight, not elsewhere classified (P07) | 71            | 0                 | 5           |

**Supplementary Table 2.** Leading causes of death from the rankable causes on the NCHS 130 Selected Causes of Infant Death List, for infants 28-364 days old in 2019 in the US ranked. There were 103 Covid-19 deaths (April 1, 2021-March 31, 2022) for this age group. Deaths, crude rates per 100,000 live births, and ranks are shown.

| <b>Ages: 0-364 days</b>                                                                    |               |                   |             |
|--------------------------------------------------------------------------------------------|---------------|-------------------|-------------|
| <b>10 Leading Causes of Death (Infants)</b>                                                | <b>Deaths</b> | <b>Crude Rate</b> | <b>Rank</b> |
| #Congenital malformations, deformations and chromosomal abnormalities (Q00-Q99)            | 4301          | 1.1               | 1           |
| #Disorders related to short gestation and low birth weight, not elsewhere classified (P07) | 3445          | 0.9               | 2           |
| #Accidents (unintentional injuries) (V01-X59)                                              | 1266          | 0.3               | 3           |
| #Sudden infant death syndrome (R95)                                                        | 1248          | 0.3               | 3           |

|                                                                          |      |     |   |
|--------------------------------------------------------------------------|------|-----|---|
| #Newborn affected by maternal complications of pregnancy (P01)           | 1245 | 0.3 | 3 |
| #Newborn affected by complications of placenta, cord and membranes (P02) | 742  | 0.2 | 6 |
| #Bacterial sepsis of newborn (P36)                                       | 603  | 0.2 | 6 |
| #Respiratory distress of newborn (P22)                                   | 424  | 0.1 | 8 |
| #Diseases of the circulatory system (I00-I99)                            | 406  | 0.1 | 8 |
| #Necrotizing enterocolitis of newborn (P77)                              | 354  | 0.1 | 8 |

**Supplementary Table 3.** Leading causes of death from the rankable causes on the NCHS 130 Selected Causes of Infant Death List, for infants 0-364 days old in 2019 in the US ranked. There were 139 Covid-19 deaths (April 1, 2021-March 31, 2022) for this age group. Deaths, crude rates per 100,000 live births, and ranks are shown.
