# Supplementary material for: Covid-19 is a leading cause of death in children and young people ages 0-19 years in the United States
Source: bioRxiv or medRxiv preprint supplement (doi:10.1101/2022.05.23.22275458), 2022-09-20
Supplement: Supplementary file [file media-1.pdf]

## Supplementary Materials for “Covid-19 is a leading cause of death in children and young people ages 0-19 years in the United States”

| Ages: 0-19 year olds                                                            |                          |        |      |
|---------------------------------------------------------------------------------|--------------------------|--------|------|
| Leading Causes of Death                                                         | Crude Rate (per 100,000) | Deaths | Rank |
| #Certain conditions originating in the perinatal period (P00-P96)               | 12.7                     | 10387  | 1    |
| #Accidents (unintentional injuries) (V01-X59,Y85-Y86)                           | 9.1                      | 7444   | 2    |
| #Congenital malformations, deformations and chromosomal abnormalities (Q00-Q99) | 6.5                      | 5286   | 3    |
| #Assault (homicide) (*U01-*U02,X85-Y09,Y87.1)                                   | 3.4                      | 2770   | 4    |
| #Intentional self-harm (suicide) (*U03,X60-X84,Y87.0)                           | 3.4                      | 2756   | 4    |
| #Malignant neoplasms (C00-C97)                                                  | 2.1                      | 1704   | 6    |
| Covid-19 (cumulative)                                                           | 1.7                      | 1433   | 7    |
| #Diseases of heart (I00-I09,I11,I13,I20-I51)                                    | 1.1                      | 867    | 8    |
| Covid-19 (annualized)                                                           | 0.8                      | 661    | 9    |
| #Influenza and pneumonia (J09-J18)                                              | 0.6                      | 472    | 10   |

**Supplementary Table S1.** Leading causes of death for children and young people aged 0-19 years in 2019 in the US ranked, compared to Covid-19 deaths either as the cumulative total incidence of Covid-19 deaths for March 1, 2020-April 30, 2022 or as annualized figures. Deaths, crude rates per 100,000, and ranks are shown.

| <b>Ages: 0-19 year olds</b>                                                                                                                                                             |                                     |               |             |
|-----------------------------------------------------------------------------------------------------------------------------------------------------------------------------------------|-------------------------------------|---------------|-------------|
| <b>Leading Causes of Death</b>                                                                                                                                                          | <b>Crude Rate<br/>(per 100,000)</b> | <b>Deaths</b> | <b>Rank</b> |
| Covid-19 (cumulative)                                                                                                                                                                   | 1.7                                 | 1433          | 1           |
| Covid-19 (annualized)                                                                                                                                                                   | 0.8                                 | 661           | 2           |
| #Influenza and pneumonia (J09-J18)                                                                                                                                                      | 0.6                                 | 472           | 3           |
| Other and unspecified infectious and parasitic diseases and their sequelae<br>(A00,A05,A20-A36,A42-A44,A48-A49,A54-A79,A81-A82,A85.0-A85.1,A85.8,A86-B04,B06-B09,B25-B49,B55-B99,U07.1) | 0.5                                 | 432           | 4           |
| Other diseases of respiratory system (J00-J06,J30-J39,J67,J70-J98)                                                                                                                      | 0.5                                 | 421           | 4           |
| Pneumonia (J12-J18)                                                                                                                                                                     | 0.4                                 | 300           | 6           |
| #Septicemia (A40-A41)                                                                                                                                                                   | 0.3                                 | 287           | 7           |
| #Chronic lower respiratory diseases (J40-J47)                                                                                                                                           | 0.3                                 | 259           | 7           |
| Certain other intestinal infections (A04,A07-A09)                                                                                                                                       | 0.3                                 | 223           | 7           |
| Asthma (J45-J46)                                                                                                                                                                        | 0.2                                 | 206           | 10          |
| Influenza (J09-J11)                                                                                                                                                                     | 0.2                                 | 172           | 10          |

**Supplementary Table S2.** Leading infectious disease / diseases of the respiratory system causes of death for children and young people aged 0-19 years in 2019 in the US ranked, compared to Covid-19 deaths either as the cumulative total incidence of Covid-19 deaths for March 1, 2020-April 30, 2022 or as annualized figures. Covid-19 is the leading cause of death. Deaths, crude rates per 100,000, and ranks are shown. Note that categories are overlapping, as indicated by the codes, e.g. pneumonia (J12-J18) is a subset of Influenza and pneumonia (J09-J18).

Covid-19 death rate in the US: March 1st, 2020-April 30th, 2022

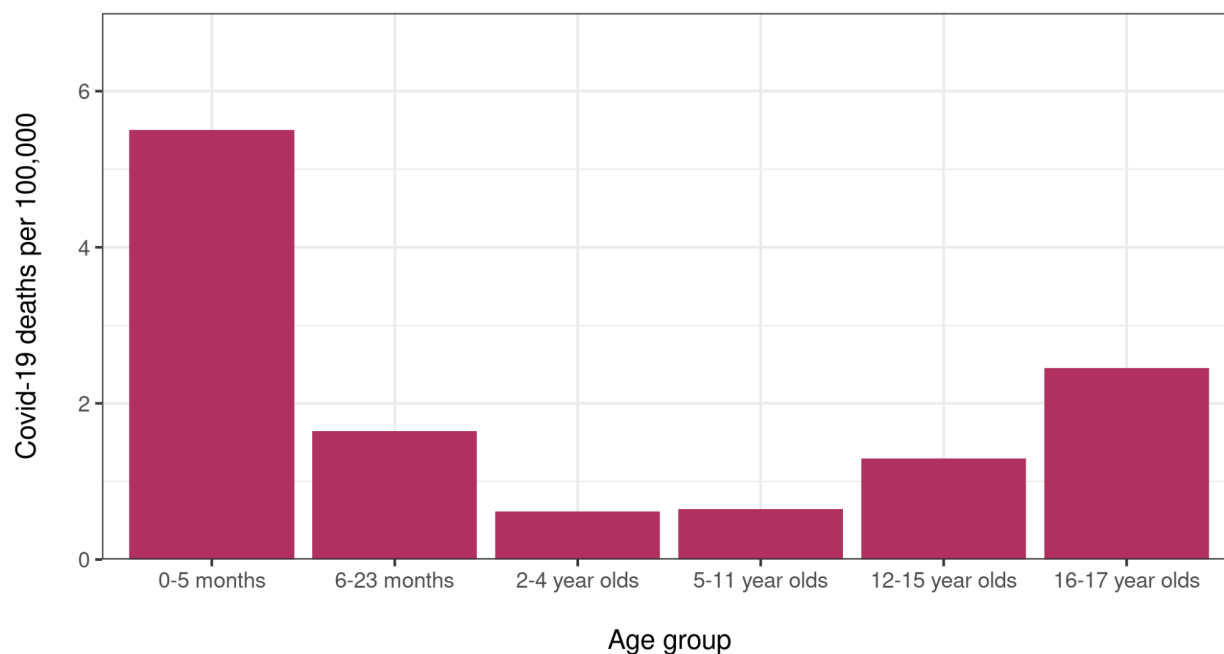

**Supplementary Figure S1.** Covid-19 death rates in the US for children and young people, by approved and possible vaccination age groupings, calculated using reports to NCHS of Covid-19 as an underlying cause of death (ICD code U07.1). Rates are calculated as Covid-19 deaths for the period March 1, 2020-April 30, 2022 per 100,000 population (2020 population estimates).
